# Supplementary material for: The XIST lncRNA is a sex-specific reservoir of TLR7 ligands in SLE
Source: PubMed Central journal article supplement (PMC10634230; doi:10.1172/jci.insight.169344), 2023-09-21
Supplement: jciinsight-8-169344-s006.pdf [file jciinsight-8-169344-s006.pdf]

## Supplementary Data

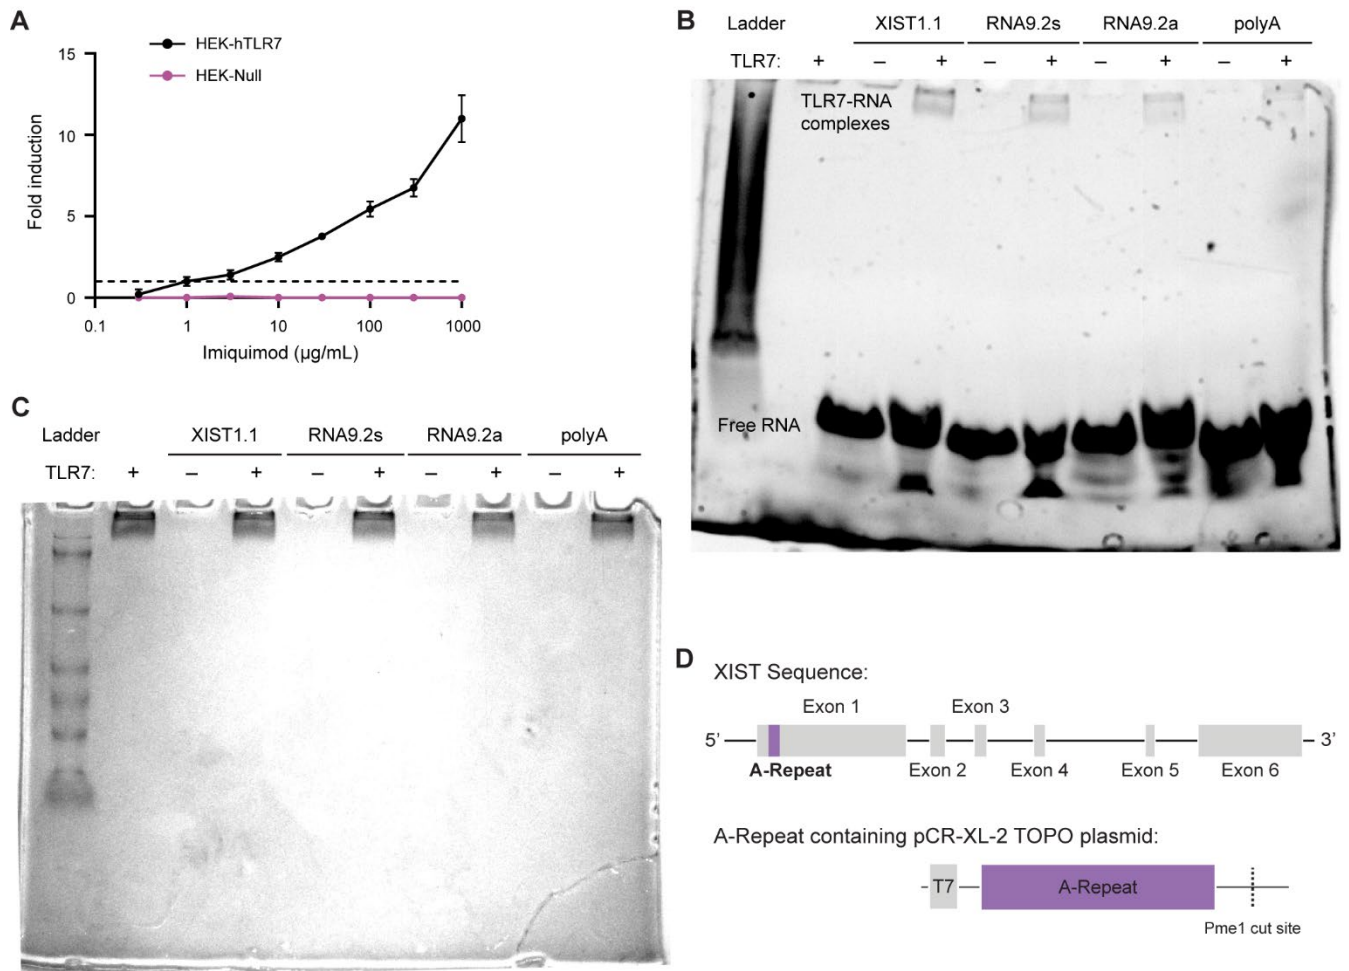

**Supplementary Fig. 1 | Cloning the A-repeat region.** **(A)** Colorimetric assay showing the production of SEAP by HEK-hTLR7 and HEK-null cells in response to treatment with varying doses of IMQ in 3 technical replicates. Fold induction relative to absorbance induced by 1 µg/ml IMQ (dotted line). **(B)** Electrophoretic mobility shift assay showing the banding pattern for FAM-labeled XIST1.1, RNA9.2s, RNA9.2a, and polyA RNA. **(C)** Protein only staining of the gel in (B), showing human recombinant TLR7. **(D)** The A-repeat region was cloned into a pCR-XL-2 TOPO plasmid containing a T7 promoter.

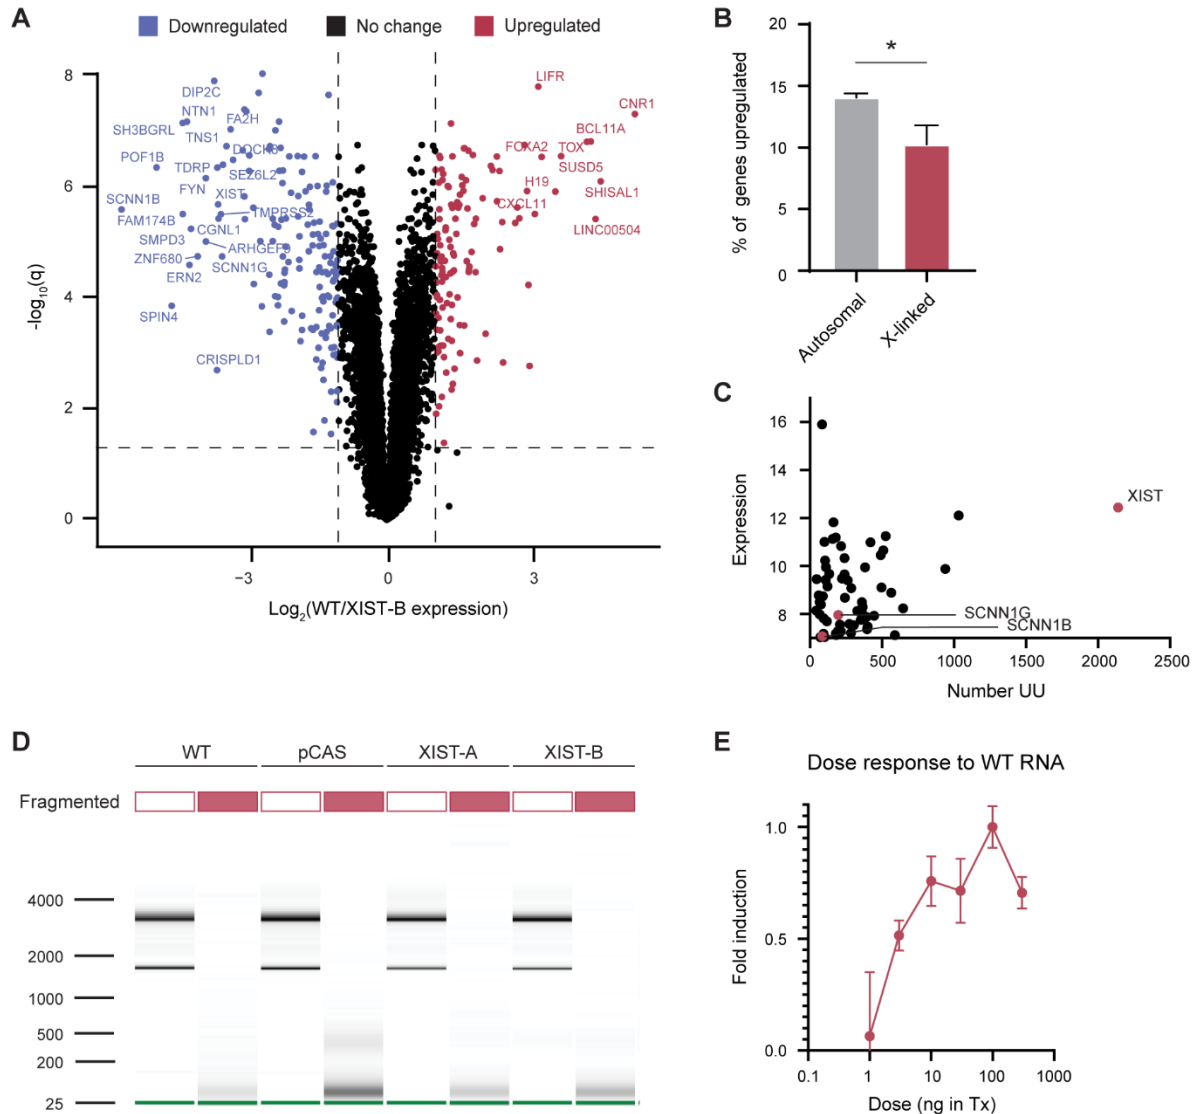

**Supplementary Fig. 2 | XIST is the most significantly different RNA enriched in TLR7 ligands between WT and XIST-B cell populations. (A)** Volcano plot showing the transcriptional differences between the XIST-B cell population versus WT. **(B)** Bar graph showing the % of genes found to be upregulated in XIST-B cells. Autosomal genes were more often upregulated than X-linked genes. **(C)** Scatter plot showing the difference in expression level and number of UU dinucleotides of all genes “lost” (> 4-fold downregulated with statistical significance) in the XIST-B cell population when compared to the WT. Genes containing the GUCCUCAA motif are colored (red) and labeled. **(D)** Cellular RNA from A431 cells was fragmented using a  $\text{Mg}^{2+}$  RNA fragmentation kit prior to transfection. Fragments were 25-50 nucleotides in length. Lanes with fragmented RNA denoted by solid red blocks. **(E)** Colorimetric assay measuring SEAP secretion by HEK-hTLR7 cells transfected with varying concentrations of  $\text{Mg}^{2+}$ -fragmented cellular RNA from the WT cells.

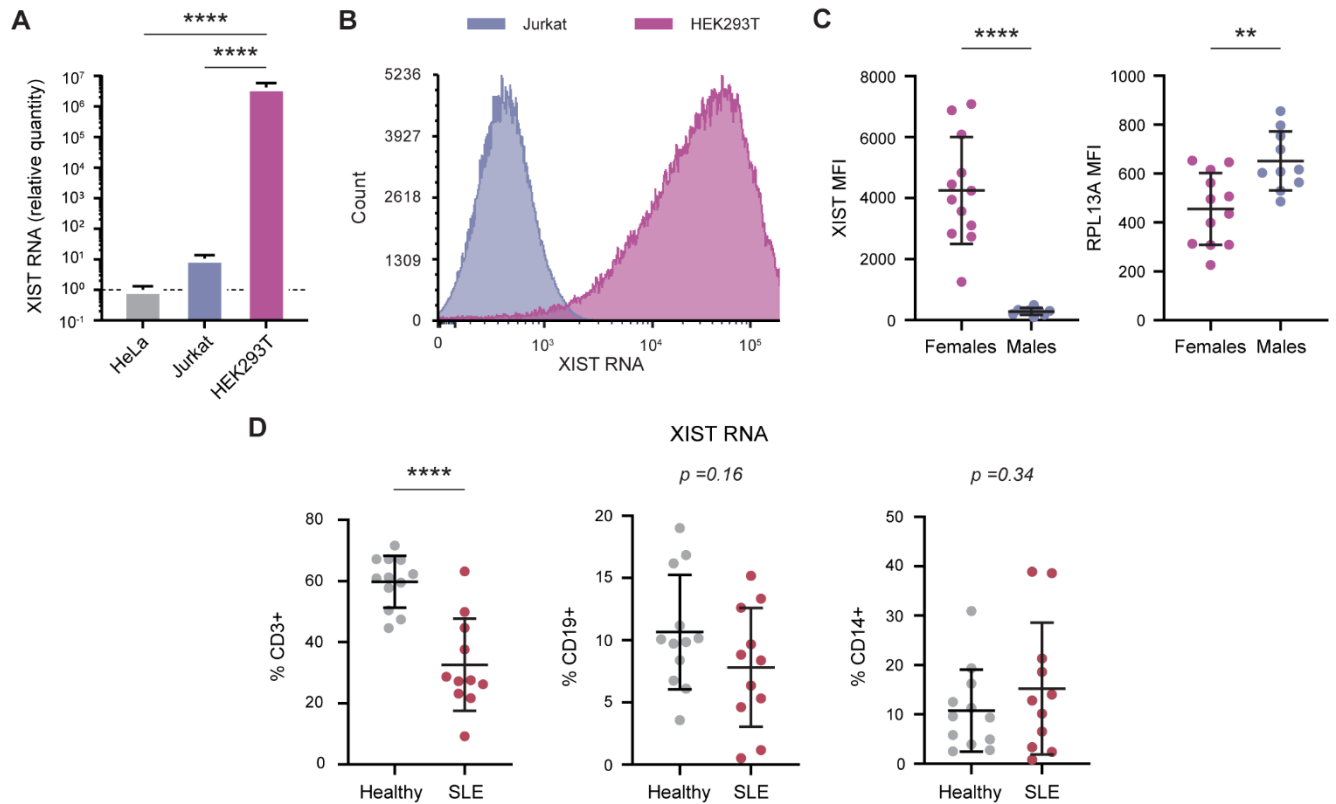

### Supplementary Fig. 3 | Validation of RNA PrimeFlow to measure XIST expression.

**(A)** Bar graphs showing XIST expression as measured by qPCR in HeLa cells (XIST-negative female cell line), Jurkat (male T cell line), and HEK293T cells (a triploid female cell line). HeLa and Jurkat cells compared to HEK293T cells by one-way Anova with multiple comparisons test. **(B)** Histograms of XIST expression in HEK293 cells and Jurkat cells as measured by RNA PrimeFlow. **(C)** Dot plots showing XIST and Rpl13A RNA MFI in female vs. male healthy donors. **(D)** Dot plots showing the frequencies of CD3+ cells, CD19+ cells, and CD14+ cells in Rpl13A+ leukocytes from SLE patients and healthy controls. **(A,C-D)** Error bars represent one standard deviation. **(C-D)** SLE and healthy controls compared by Student's t test. \* indicates  $p < 0.05$ , \*\* indicates  $p < 0.01$ , \*\*\*\* indicates  $p < 0.0001$ .



**Supplementary Table 4: Demographics and disease characteristics of SLE patients.**

|                                                       | <b>SLE<br/>(n=11)</b> | <b>Healthy Control<br/>(n=12)</b> |
|-------------------------------------------------------|-----------------------|-----------------------------------|
| <b>Sex</b>                                            |                       |                                   |
| <i>Female, n (%)</i>                                  | 11 (100%)             | 12 (100%)                         |
| <i>Male, n (%)</i>                                    | 0 (0%)                | 0 (0%)                            |
| <b>Ethnicity</b>                                      |                       |                                   |
| <i>Caucasian, n (%)</i>                               | 9 (82%)               | 10 (83%)                          |
| <i>African American, n (%)</i>                        | 2 (18%)               | 1 (8%)                            |
| <i>Native American, n (%)</i>                         | 0 (0%)                | 1 (8%)                            |
| <b>Age at sample collection,<br/>years, Mean ± SD</b> | 44.5 ± 11.9           | 37.9 ± 13.2                       |
| <b>Age at SLE diagnosis,<br/>years, Mean ± SD</b>     | 25.7 ± 10.9           | n/a                               |
| <b>Clinical findings</b>                              |                       |                                   |
| <i>Malar Rash, n (%)</i>                              | 5 (45%)               | n/a                               |
| <i>Discoid Rash, n (%)</i>                            | 2 (18%)               | n/a                               |
| <i>Photosensitivity, n (%)</i>                        | 7 (64%)               | n/a                               |
| <i>Mouth Ulcer, n (%)</i>                             | 7 (64%)               | n/a                               |
| <i>Arthritis, n (%)</i>                               | 5 (45%)               | n/a                               |
| <i>Proteinuria, n (%)</i>                             | 7 (64%)               | n/a                               |
| <i>Serositis, n (%)</i>                               | 5 (45%)               | n/a                               |
| <i>Neurologic, n (%)</i>                              | 1 (9%)                | n/a                               |
| <i>Hematologic, n (%)</i>                             | 10 (91%)              | n/a                               |
| <i>Immunologic, n (%)</i>                             | 10 (91%)              | n/a                               |
| <b>ACR Criteria</b>                                   | 6.0 ± 1.6             | n/a                               |

n/a = not assessed

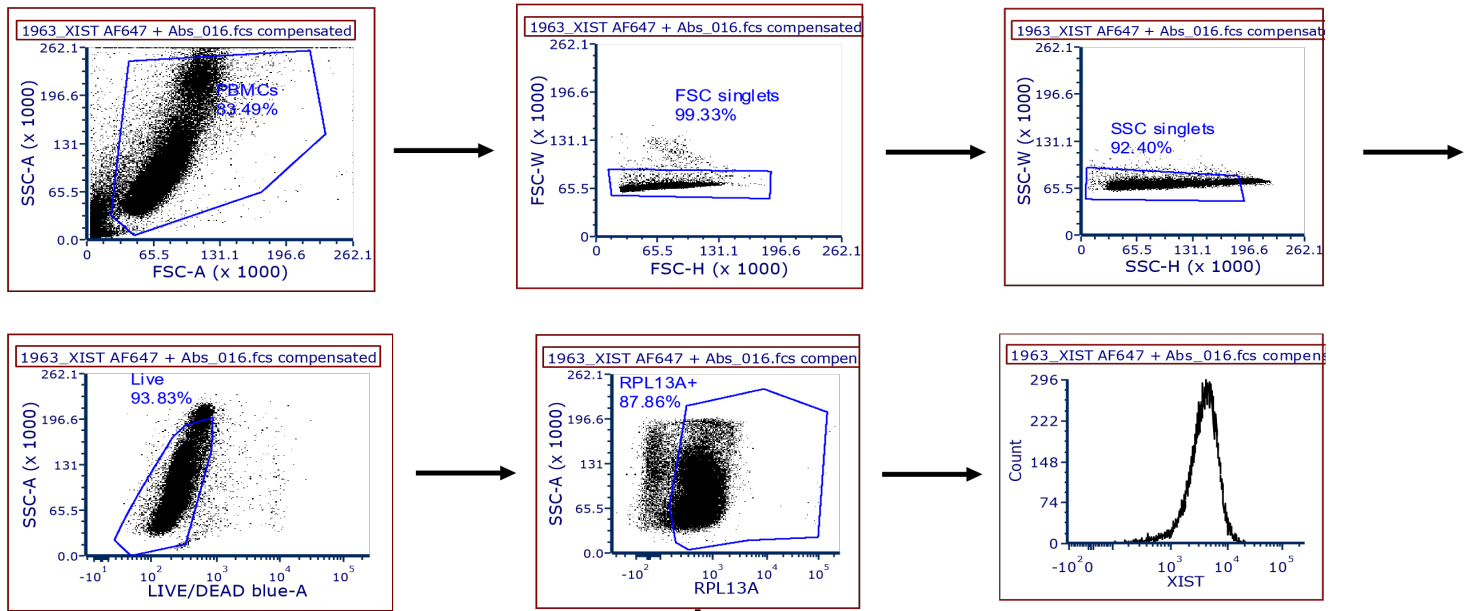

Fig. 4A

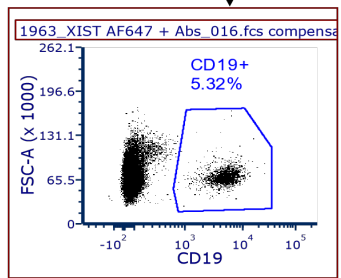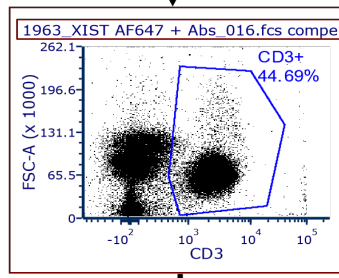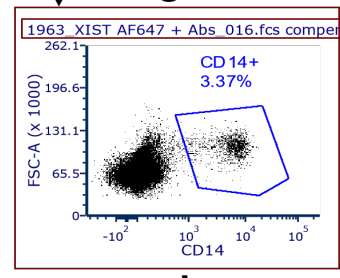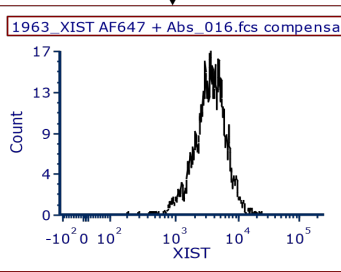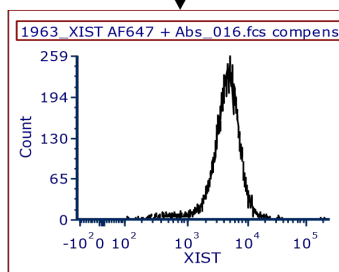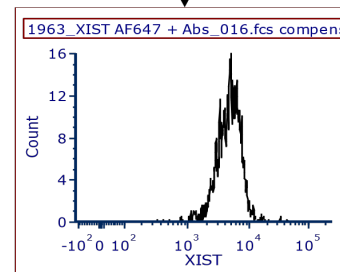

Fig. 4B

Fig. 4C

Fig. 4D

Supplementary Fig. 4 | Gating Strategy for RNA Primeflow
